# Supplementary material
Source: ML conference proceedings conference paper supplement (https://openreview.net/forum?id=YktFxpaEmR)

Original  
image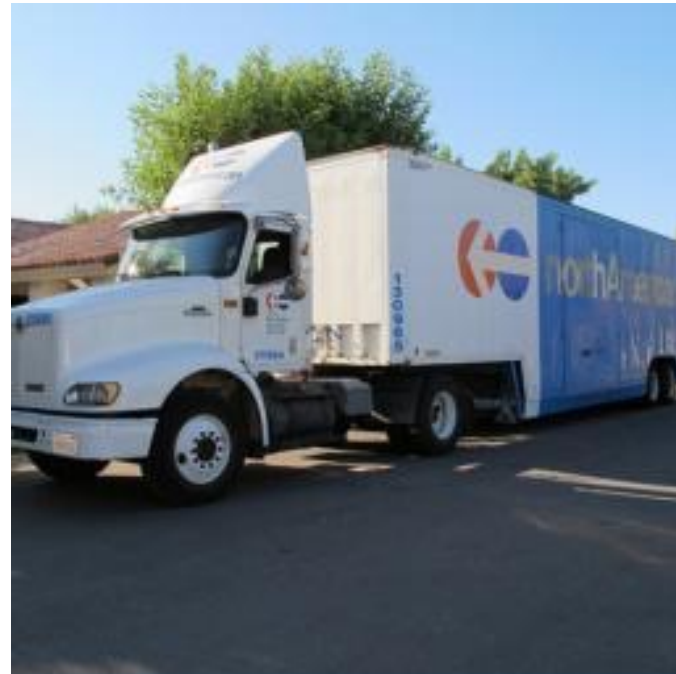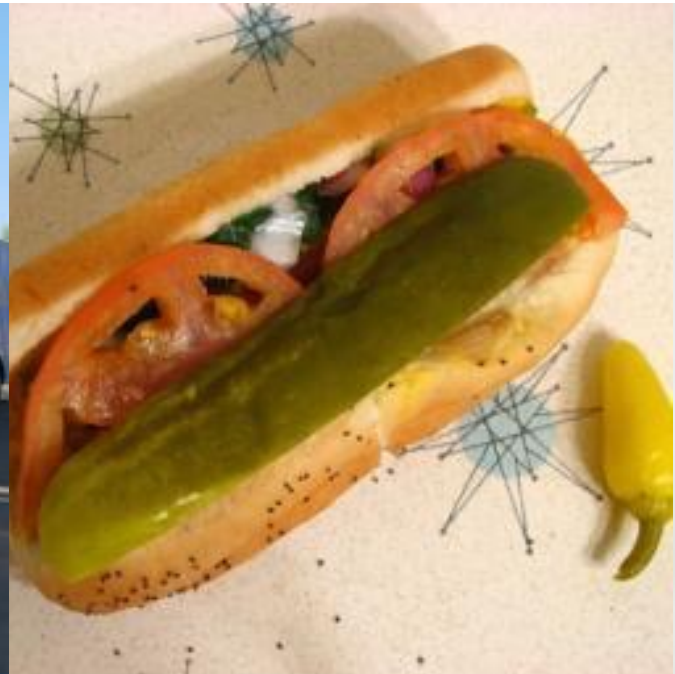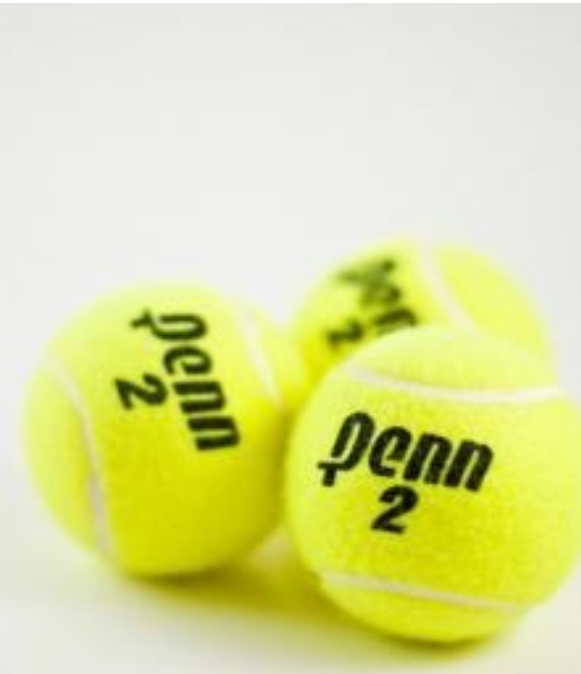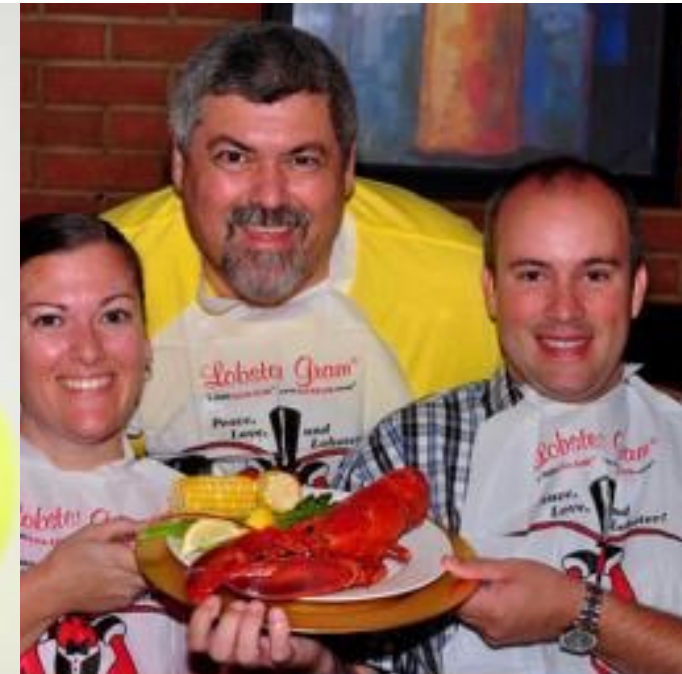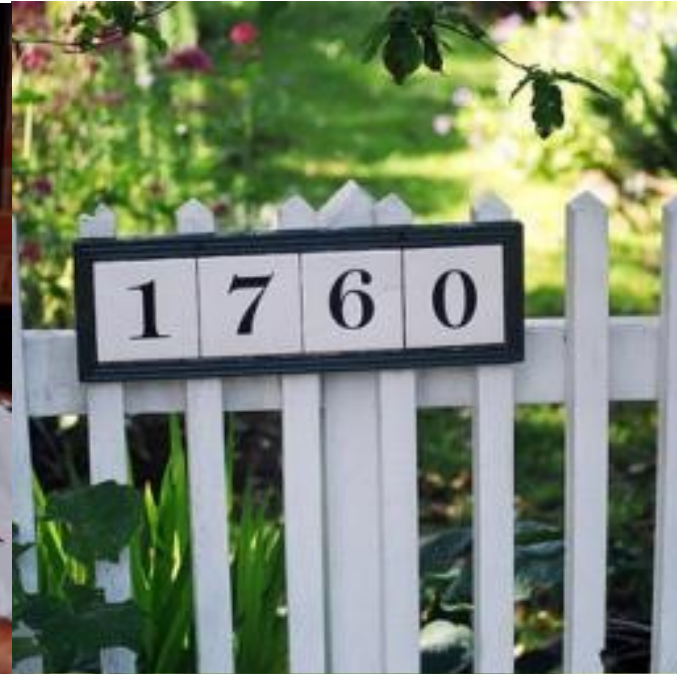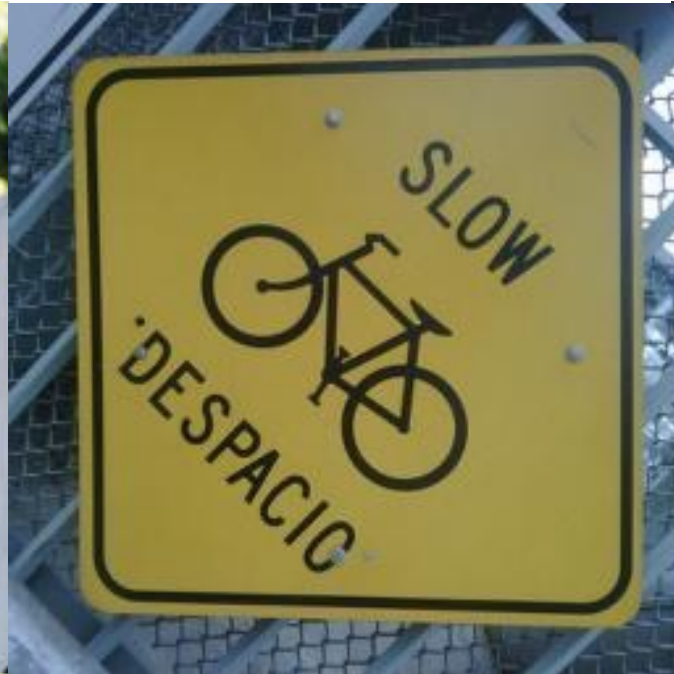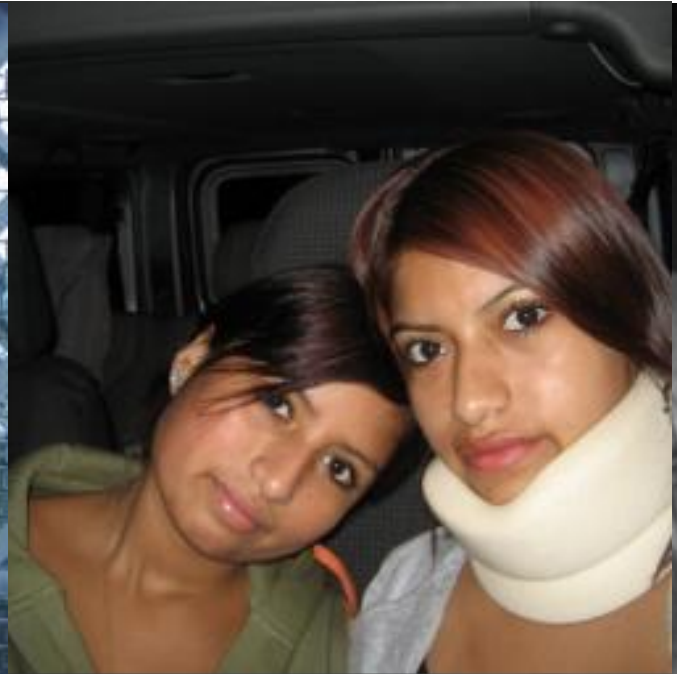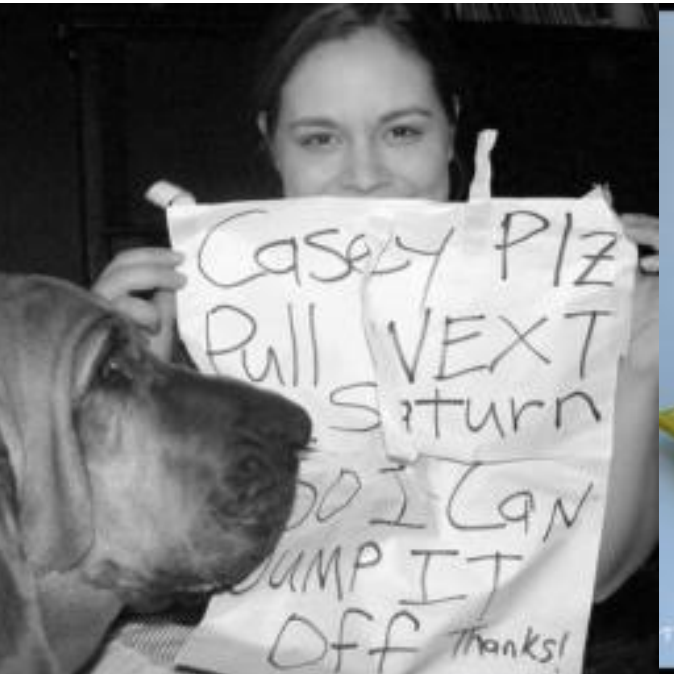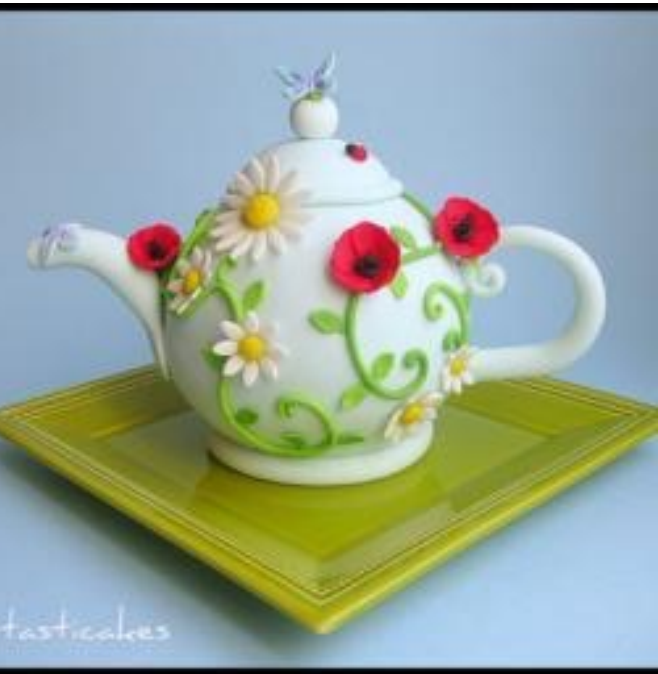

VQGAN-LC

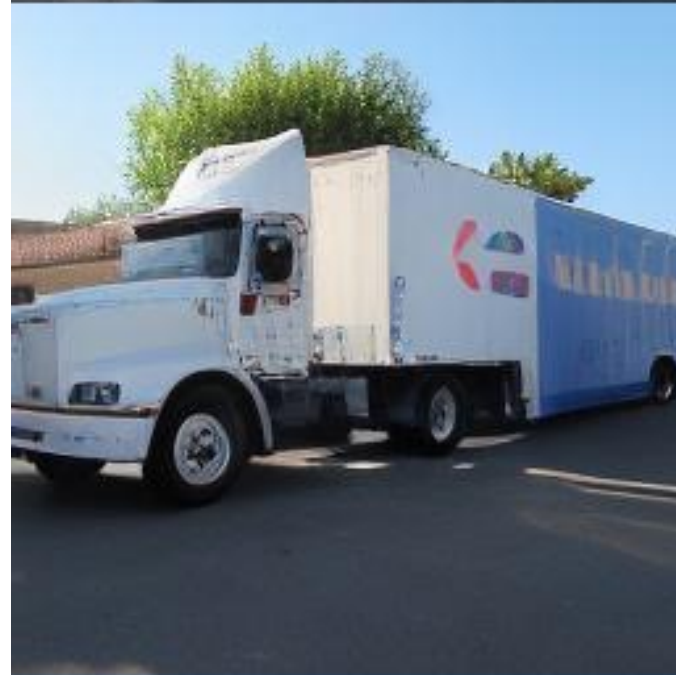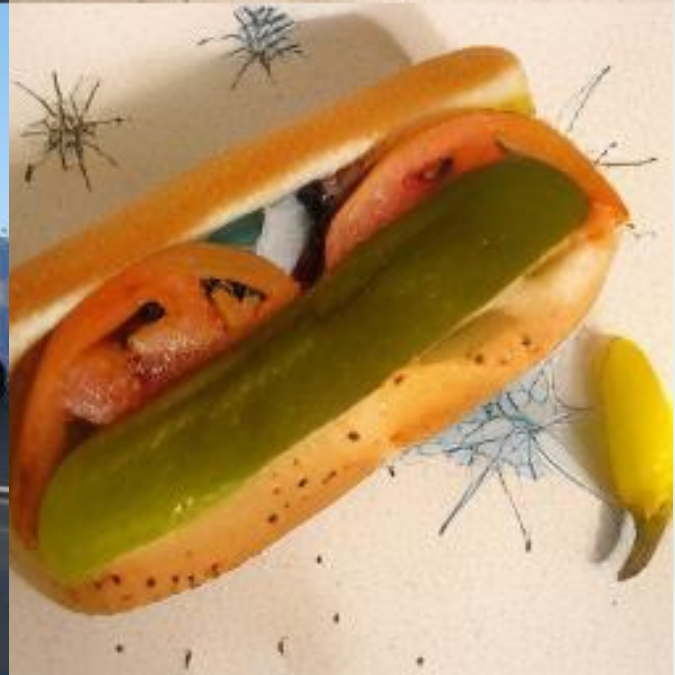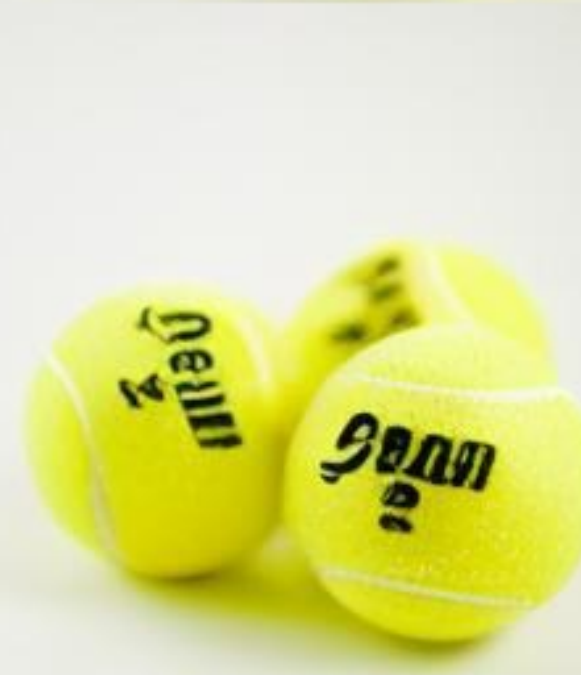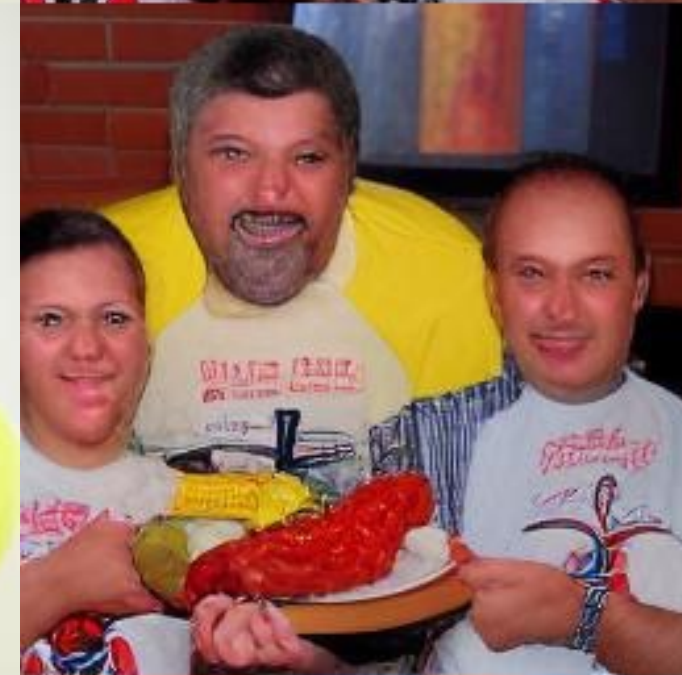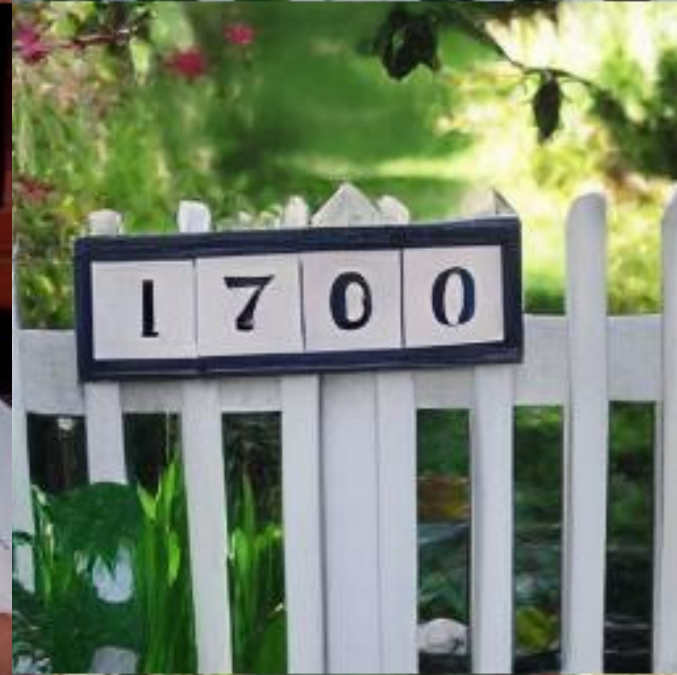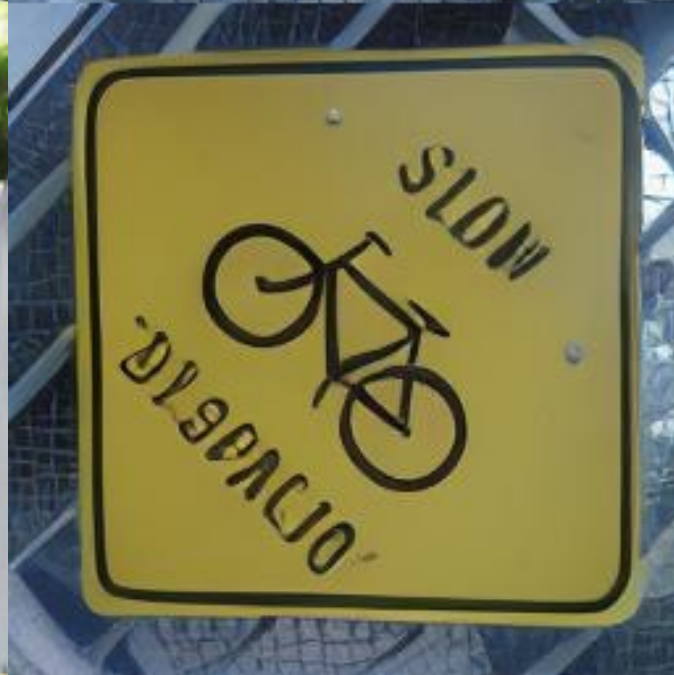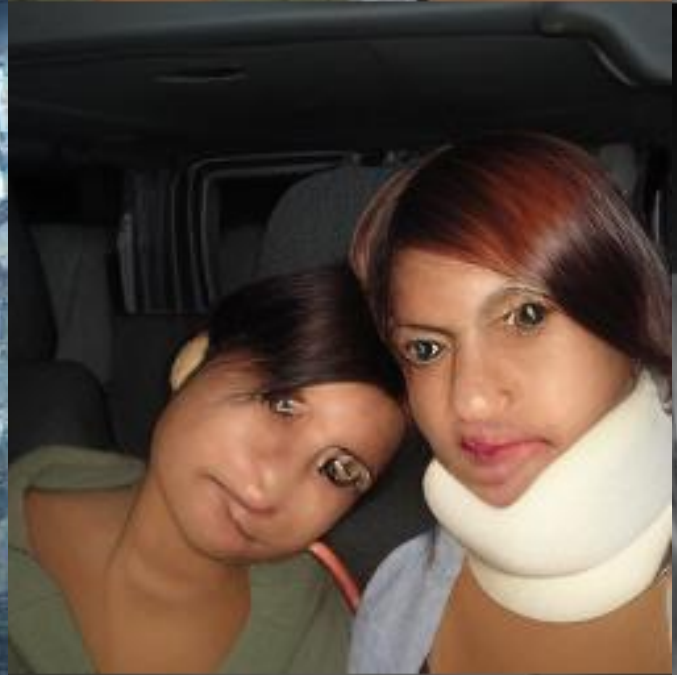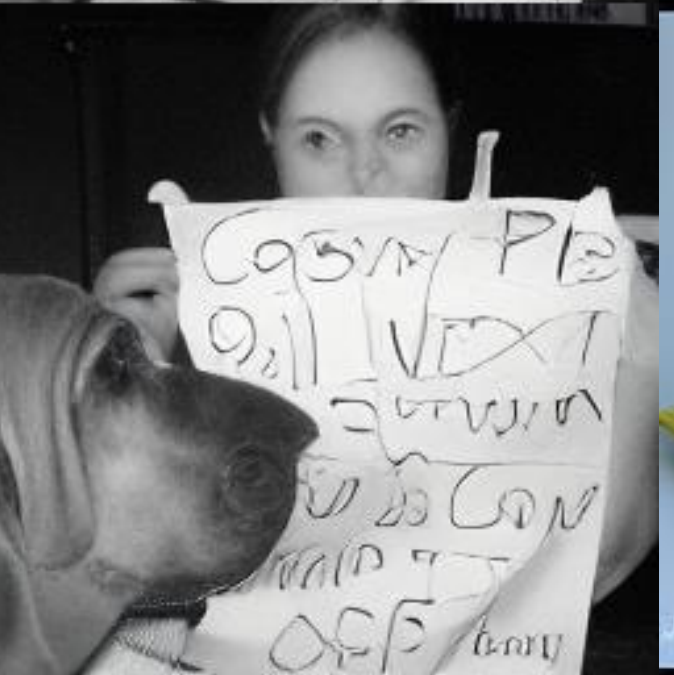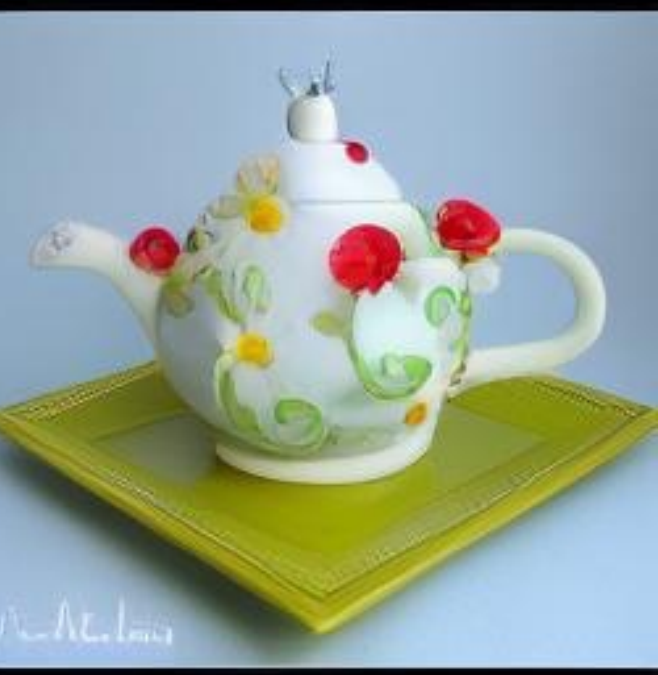

FlowMo

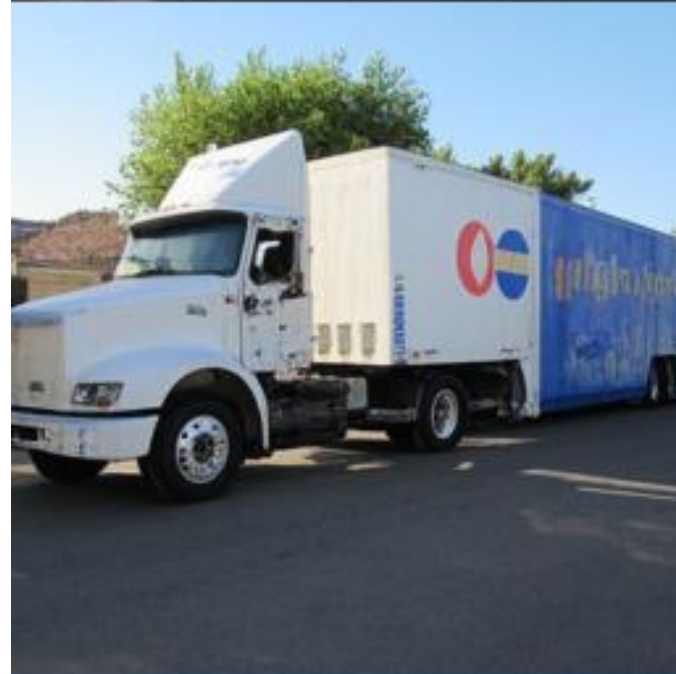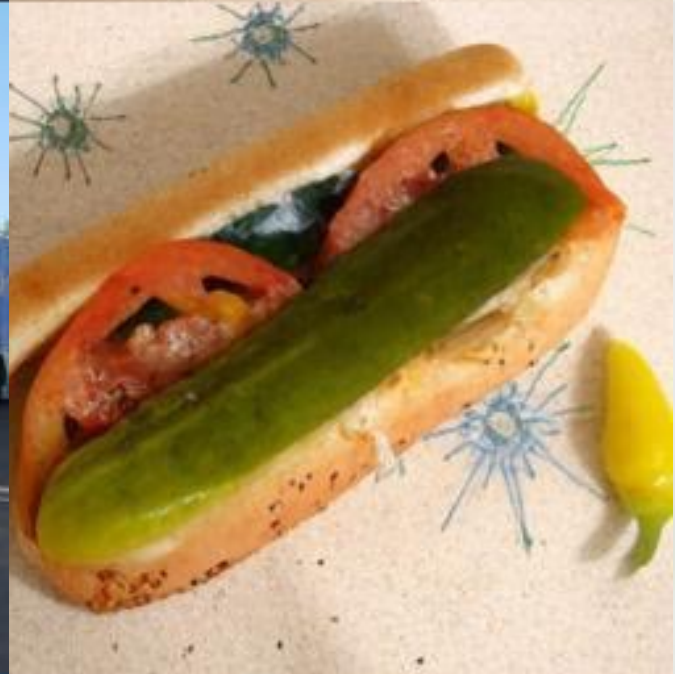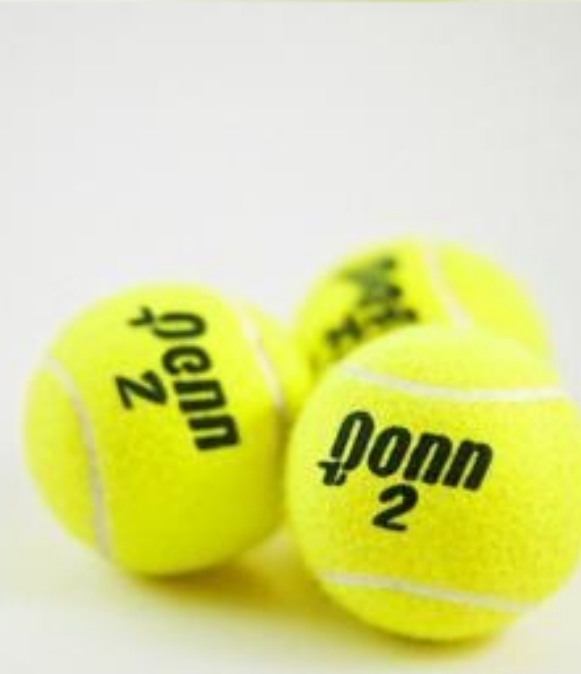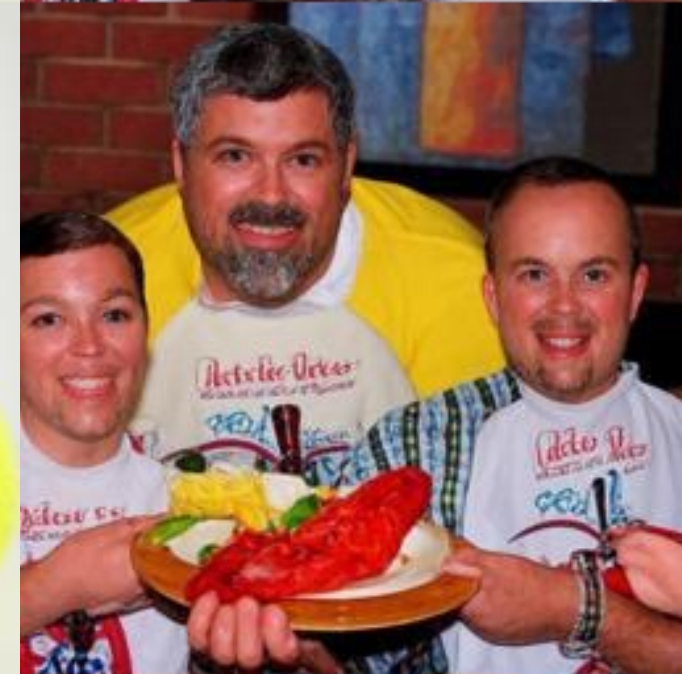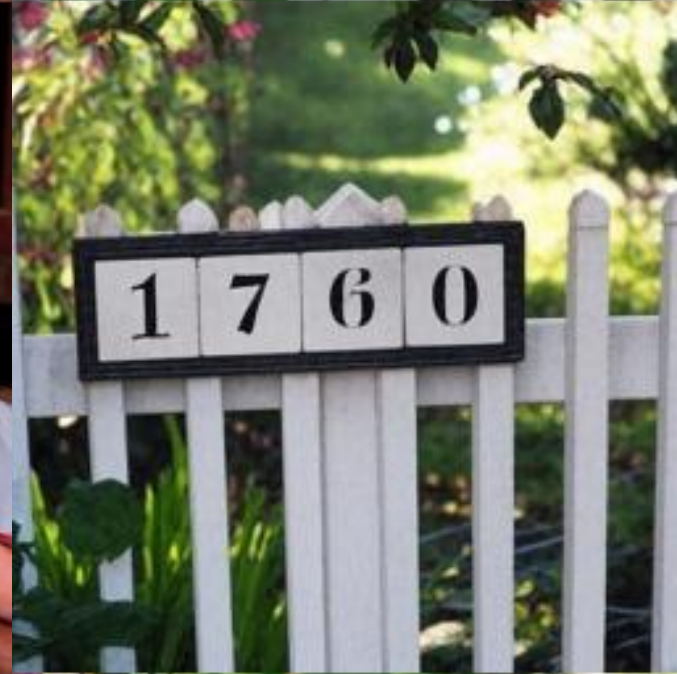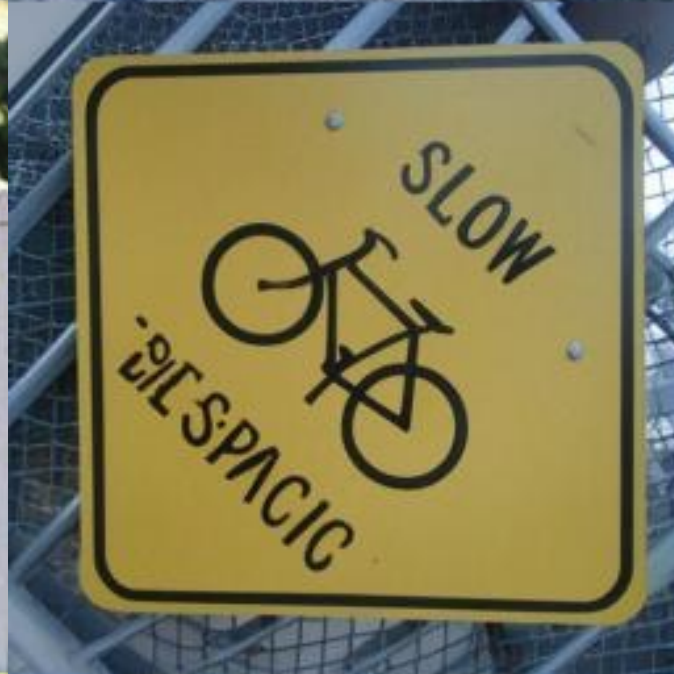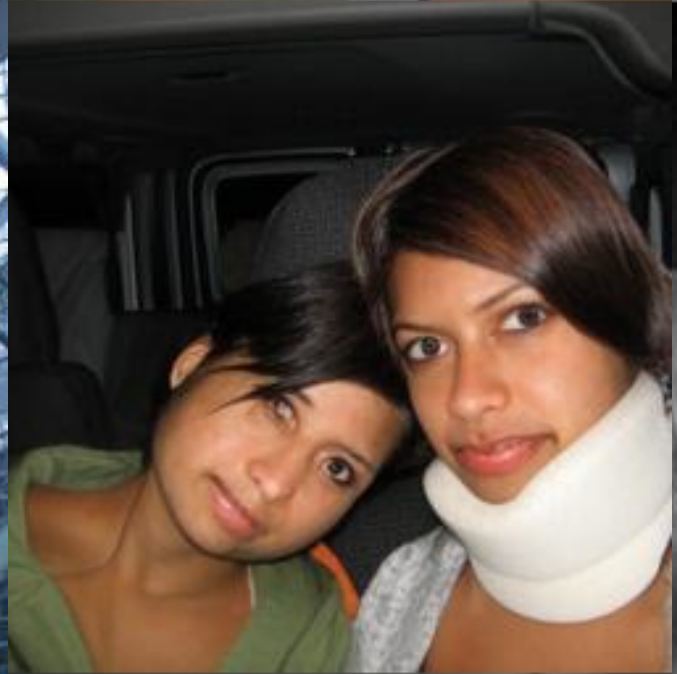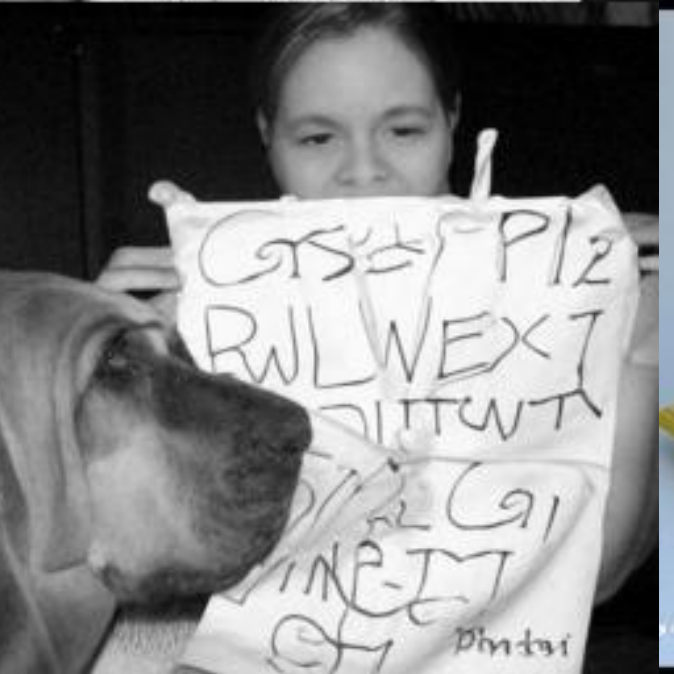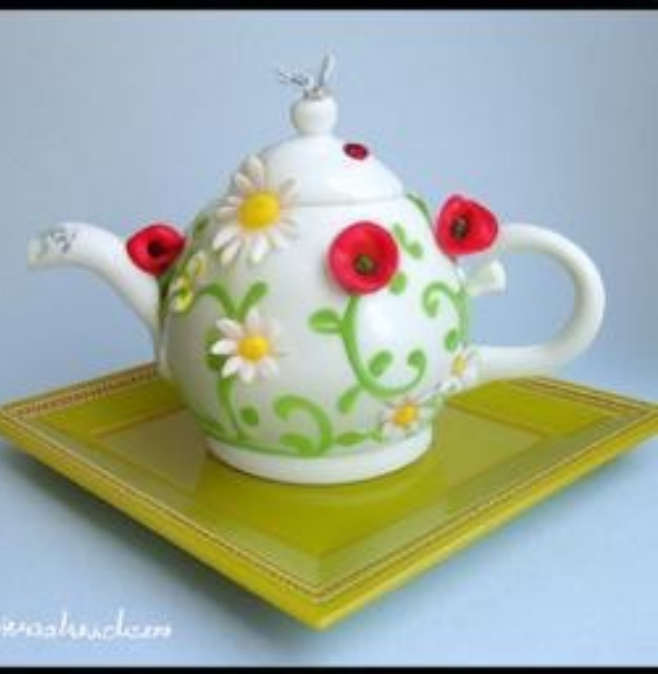

VAR

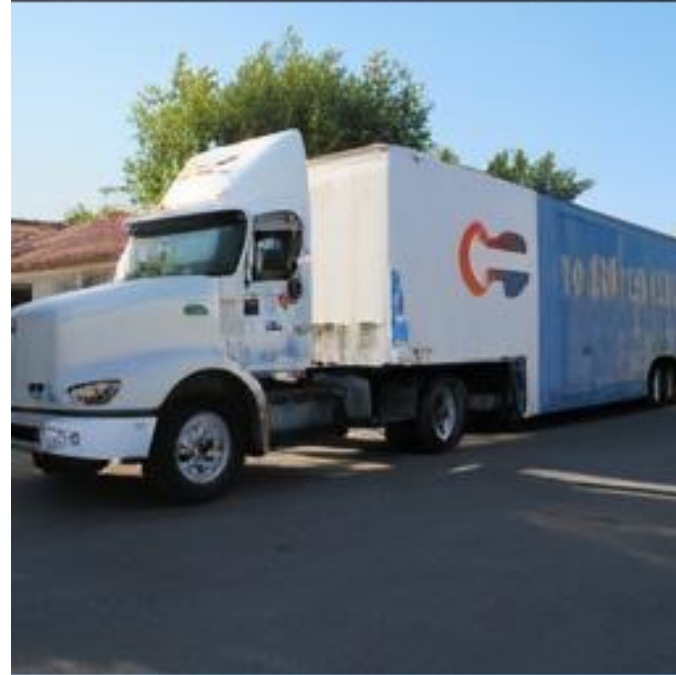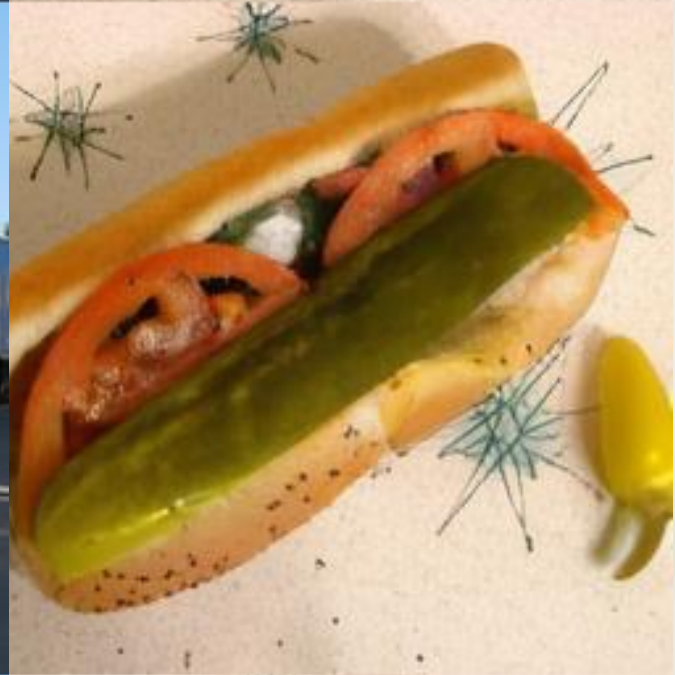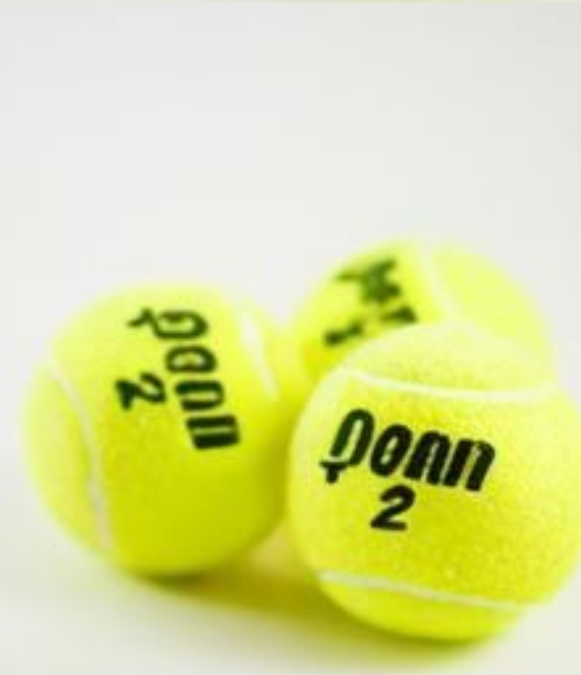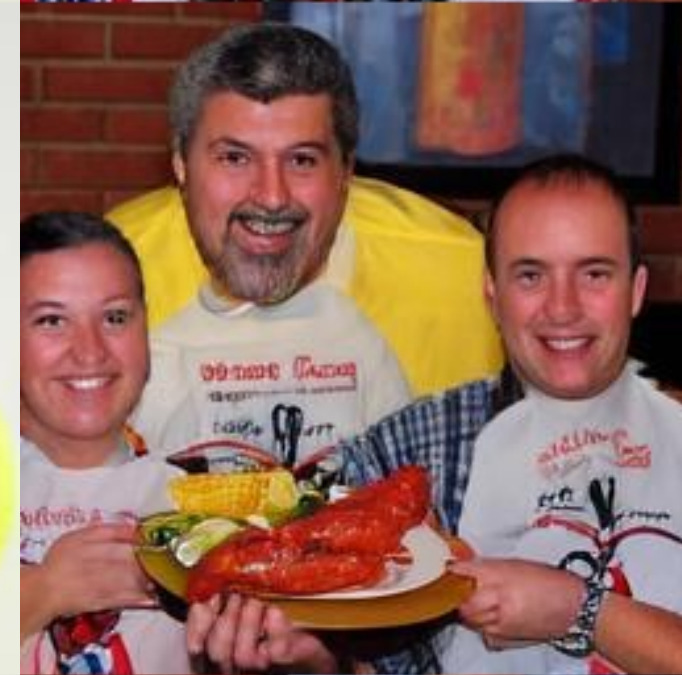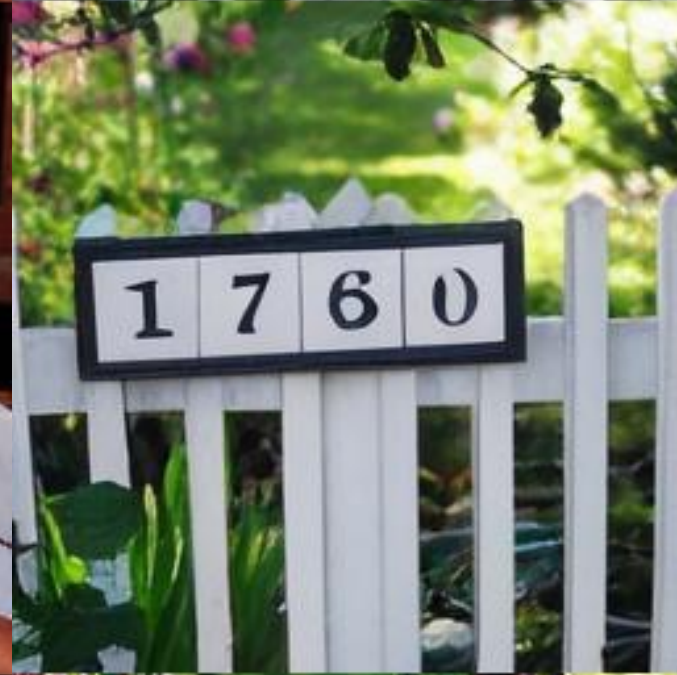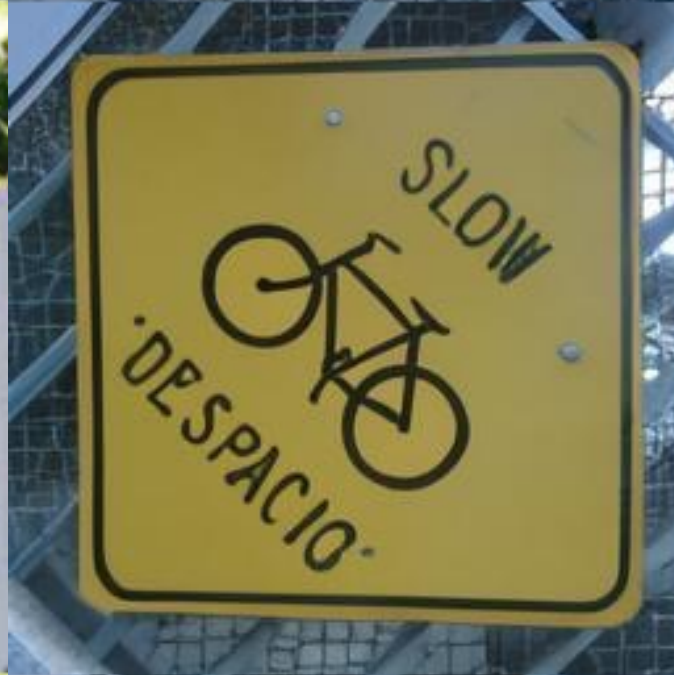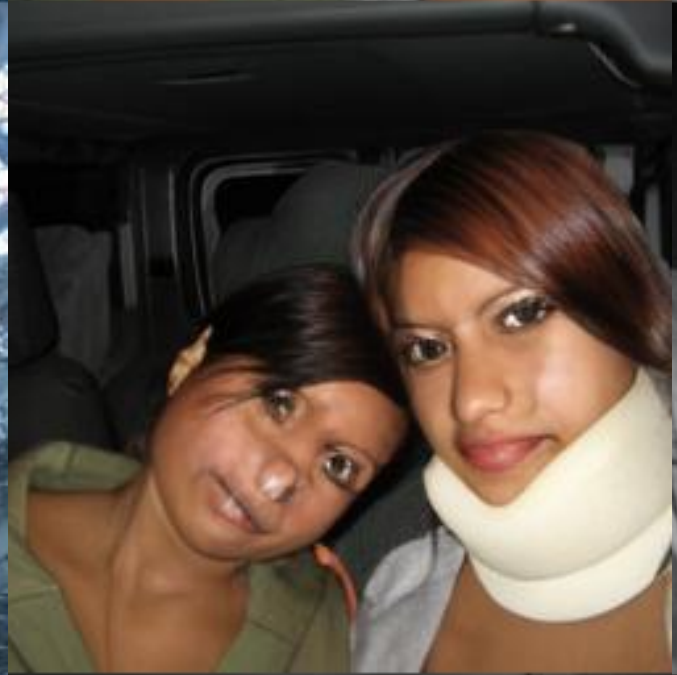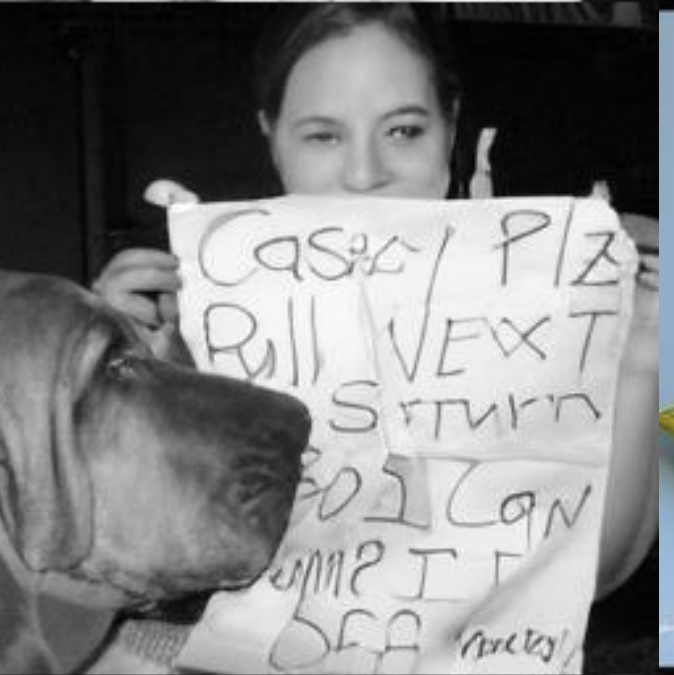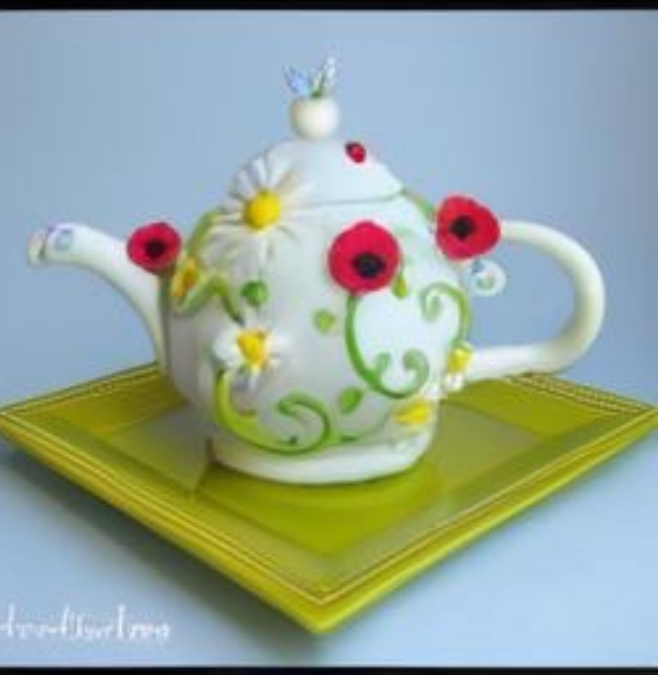

Selftok

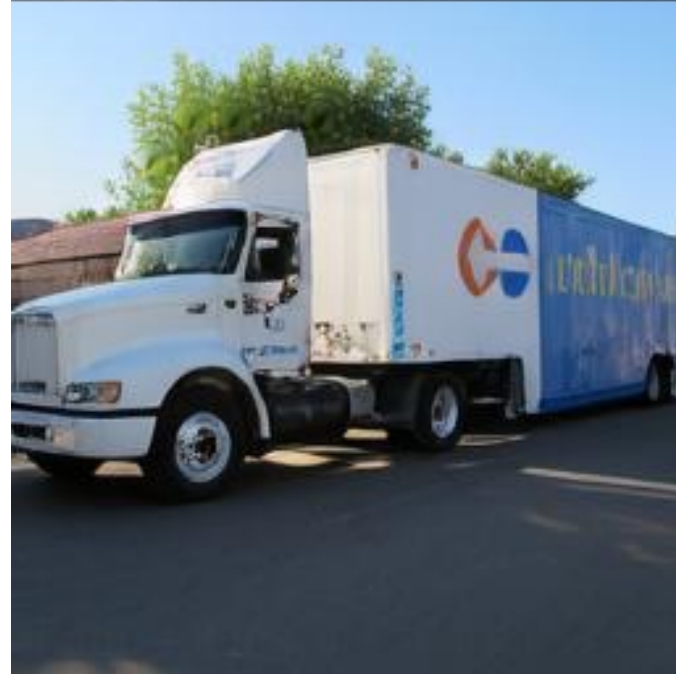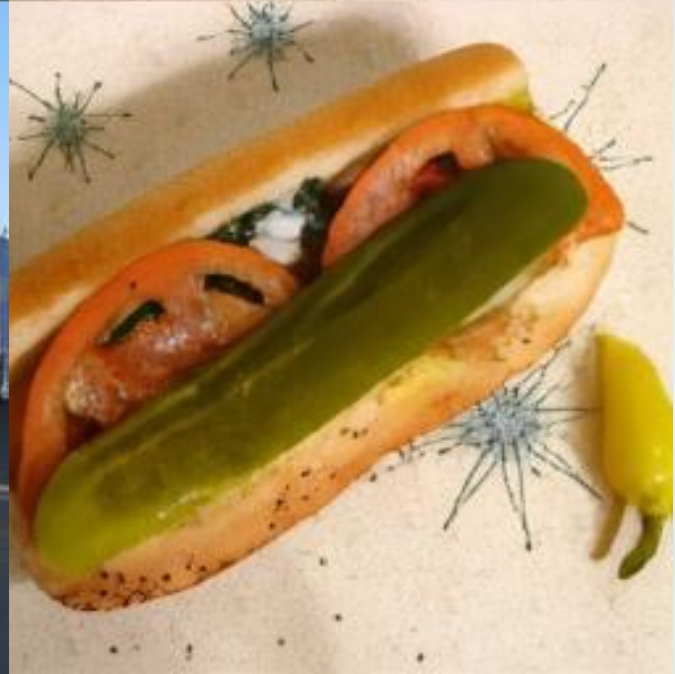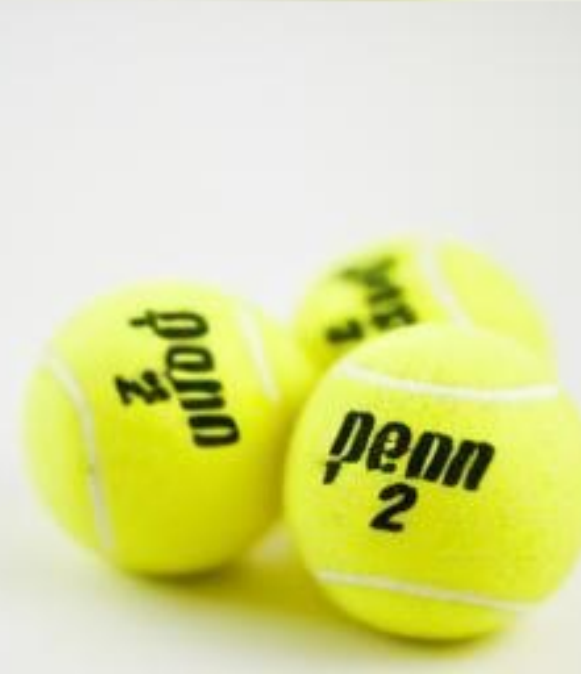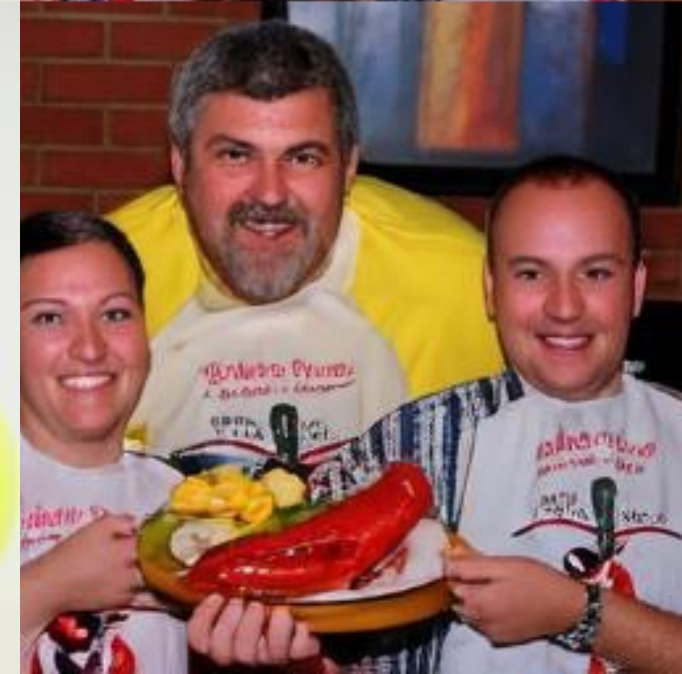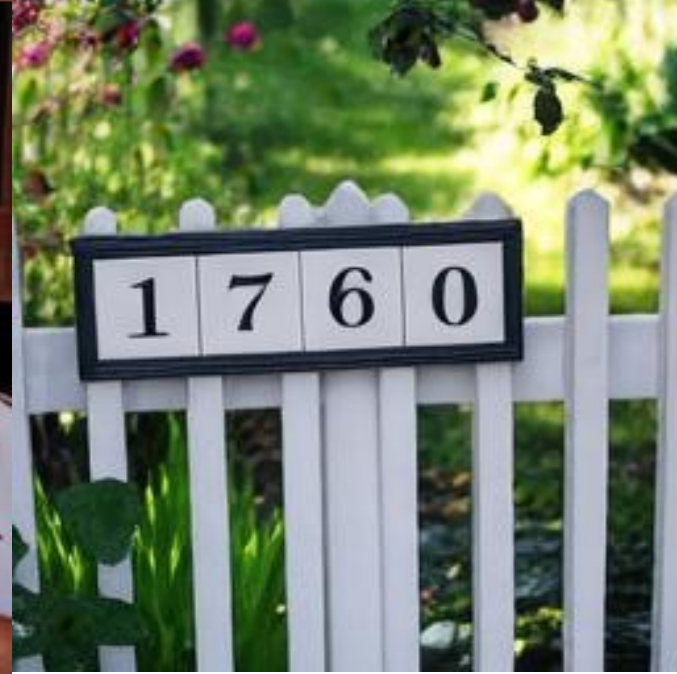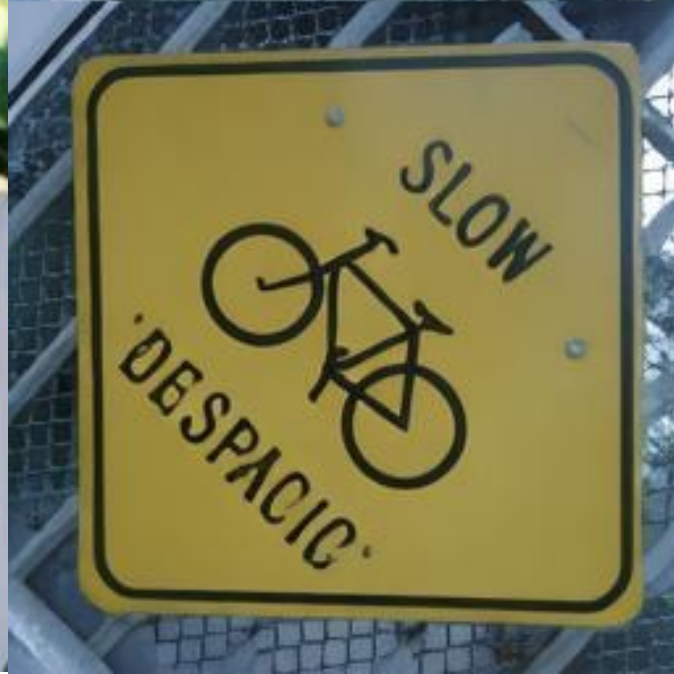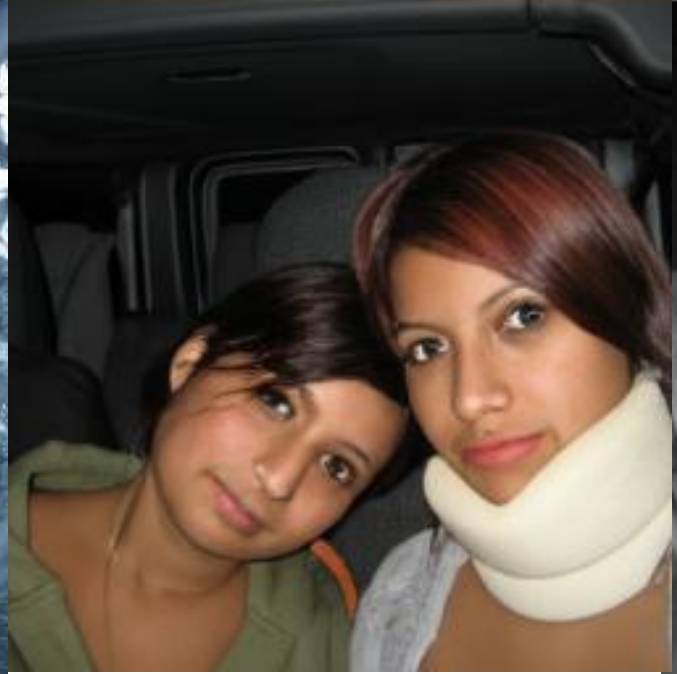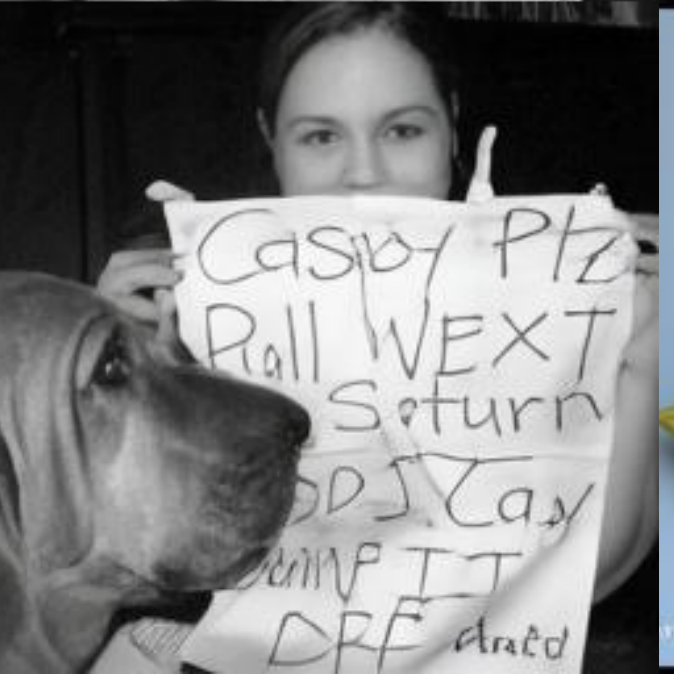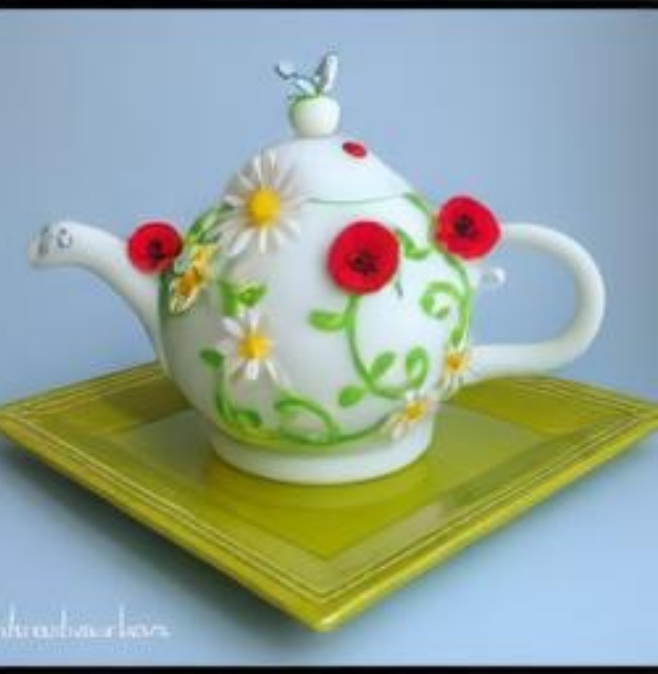

Supplement: supplementary_material [file reconstruction.pdf › selftok_zero/SelftokTokenizer/assets/reconstruction.pdf]
